# Supplementary material for: The analytical and biomedical applications of carbon dots and their future theranostic potential: A review
Source: PubMed Central journal article supplement — J Food Drug Anal. 2020 Dec 1;28(4):677–95. doi: 10.38212/2224-6614.1154 (PMC9261808; doi:10.38212/2224-6614.1154), 2020-12-01
Supplement: jfda-28-04-677-s001.pdf [file jfda-28-04-677-s001.pdf]

## **Research Highlights**

- Carbon dots (C-dots) possess stable photoluminescence (PL) from the ultraviolet to near-infrared (NIR) region.
- The inherent properties (multicolor fluorescence, resistance to photobleaching, and biocompatibility) of C-dots make them suitable for diagnostics.
- Catalytic and biological activities of C-dots show their potential in therapeutics.
- Theranostics using various C-dots based platforms has been realized.
